# Supplementary material
Source: MDPI journal article supplement (https://www.mdpi.com/2076-3417/11/8/3696)
Supplement: s1 [file s1]

**Table S1.** The primers for quantitative PCR

| <b>Primer</b>                       | <b>Function</b>          | <b>F/R</b> | <b>Sequence (5' → 3')</b> |
|-------------------------------------|--------------------------|------------|---------------------------|
| <i>PRELI</i>                        | Against oxidative stress | F          | GGGTTAGTCATTGCCCTGCT      |
|                                     |                          | R          | TTCTCTGTAGCTGCCAGTGC      |
| <i>ABCB1</i>                        | Efflux transporter       | F          | TCTTGTCAAACTGCCTGTGA      |
|                                     |                          | R          | TAATTGTGCCTCACCCACC       |
| <i>ABCC2</i>                        | Efflux transporter       | F          | CAAAACGAGTTCGCCCCTG       |
|                                     |                          | R          | GGGTTAAGCCATCCGTGTCA      |
| <i>ABCG2</i>                        | Efflux transporter       | F          | AGTTCTCAGCAGCTCTTCGG      |
|                                     |                          | R          | AGTCTTCTTCTCTGTTAATGCCAC  |
| <i>OATPB1</i><br>( <i>SLCO1B1</i> ) | Influx transporter       | F          | TGCCGGACTAACCATGACCT      |
|                                     |                          | R          | GTGGAACCCAGTCAAGTG        |
| <i>OCT1</i>                         | Influx transporter       | F          | TCGGTGGCTGTTATCACAAA      |
|                                     |                          | R          | AGGAGGCAACTTCCCATTTCT     |
| <i>BECLIN</i>                       | Autophagy                | F          | GGGCTCCCAGGGATGG          |
|                                     |                          | R          | TCCTCTAGTGCCAGTCTCTT      |
| <i>mTOR2</i>                        | Autophagy                | F          | AGTACGAGGGCGGAATGACA      |
|                                     |                          | R          | GCCACCACCTCTGGATTCTG      |
| <i>S1P</i>                          | Autophagy                | F          | AGTGCCAAGGATTTGCTCCA      |
|                                     |                          | R          | AGAAGCAACACTGGTCCCTG      |
| <i>XBP1</i>                         | Autophagy                | F          | AGGCTCGAATGAGTGAGCTG      |
|                                     |                          | R          | TGCACGTAGTCTGAGTGCTG      |
| <i>BAX</i>                          | Mitochondria apoptosis   | F          | AGCCGACTTCAATTGTGGGT      |
|                                     |                          | R          | GACAGGGACATCAGTCGCTT      |
| <i>Cyto C</i>                       | Mitochondria apoptosis   | F          | ATGAATGACCACTCTAGCCACTT   |
|                                     |                          | R          | ATAGAAACAGCCAGGACCGC      |
| <i>BCL2</i>                         | Mitochondria apoptosis   | F          | CTGCTGACAGCTTGGAAGA       |
|                                     |                          | R          | ATTGGGCTACCCAGCAATG       |
| <i>GAPDH</i>                        | Housekeeping             | F          | GTGGTCTCCTCTGACTTCAACA    |
|                                     |                          | R          | CTCTTCTCTTGCTCTTGCT       |
