# Supplementary material
Source: MDPI journal article supplement (https://www.mdpi.com/2076-3417/11/8/3696)
Supplement: s1 [file s1]

Table S2. The Percentile of marker expressing cells under various conditions

| Marker | S     | S (Knock) | S + A.S | S + A.S (Knock) | R     | R (Knock) | R+A.S | R+A.S (Knock) |
|--------|-------|-----------|---------|-----------------|-------|-----------|-------|---------------|
| PRELI  | 20.00 | 13.30     | 15.33   | 11.27           | 47.37 | 22.30     | 24.10 | 10.33         |
| ABCB1  | 20.00 | 18.20     | 17.53   | 17.87           | 73.33 | 31.90     | 33.30 | 16.53         |
| ABCC2  | 23.93 | 23.37     | 22.47   | 22.30           | 38.53 | 19.63     | 26.33 | 11.37         |
| ABCG2  | 10.00 | 9.30      | 9.70    | 9.70            | 30.63 | 21.00     | 25.93 | 12.27         |
| OCT-1  | 34.67 | 34.27     | 37.93   | 31.80           | 17.27 | 34.60     | 25.70 | 51.93         |

(S : susceptible cell, R: resistant cells, A.S : extract, Knock : PRELI knock down) (each value = average %)
