# Supplementary material
Source: MDPI journal article supplement (https://www.mdpi.com/2076-3417/11/8/3696)

Figure S1. Full gels for PCR data in the manuscript

Figure1, 3

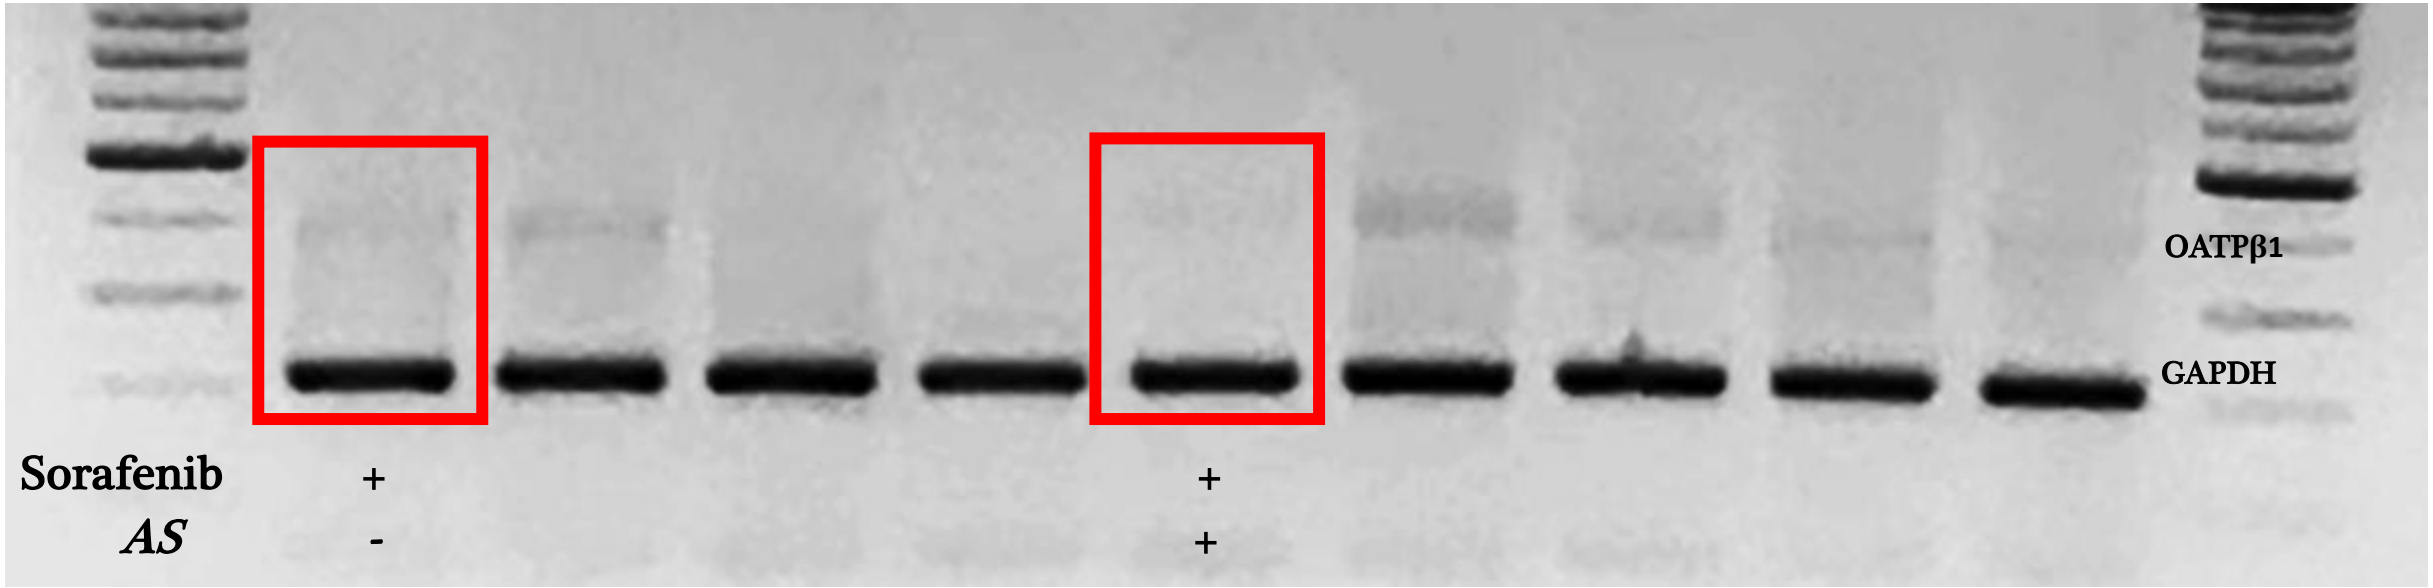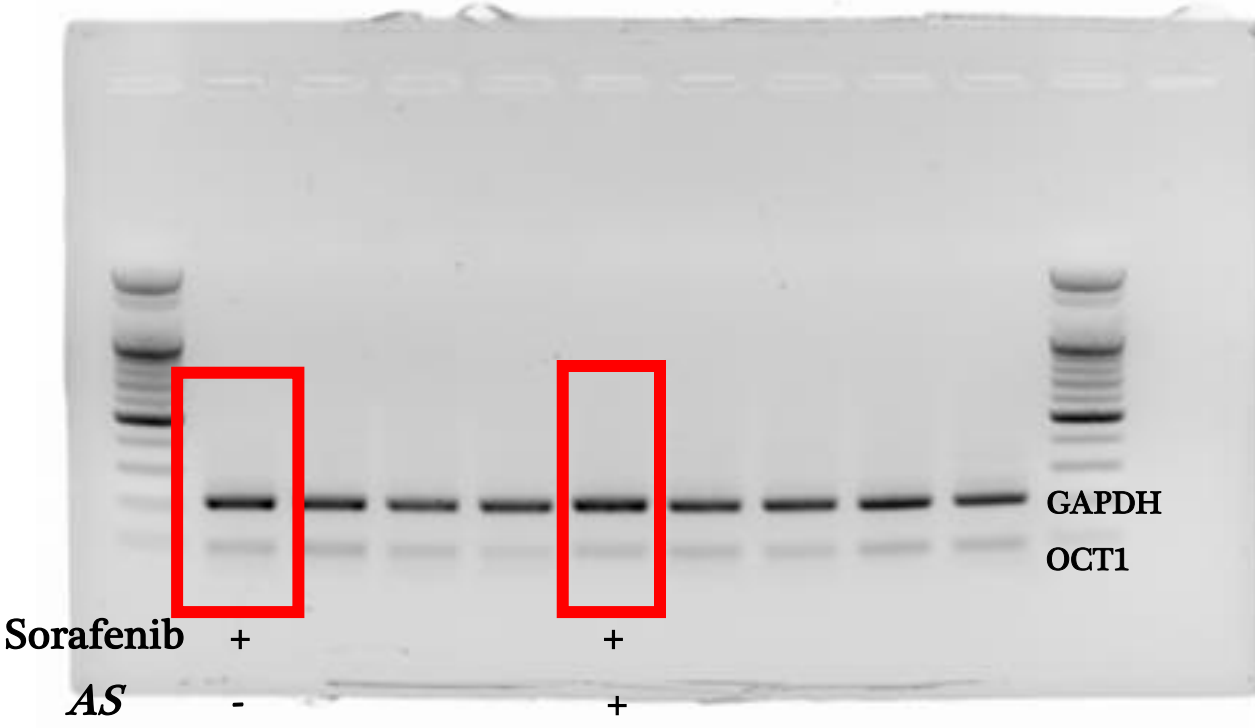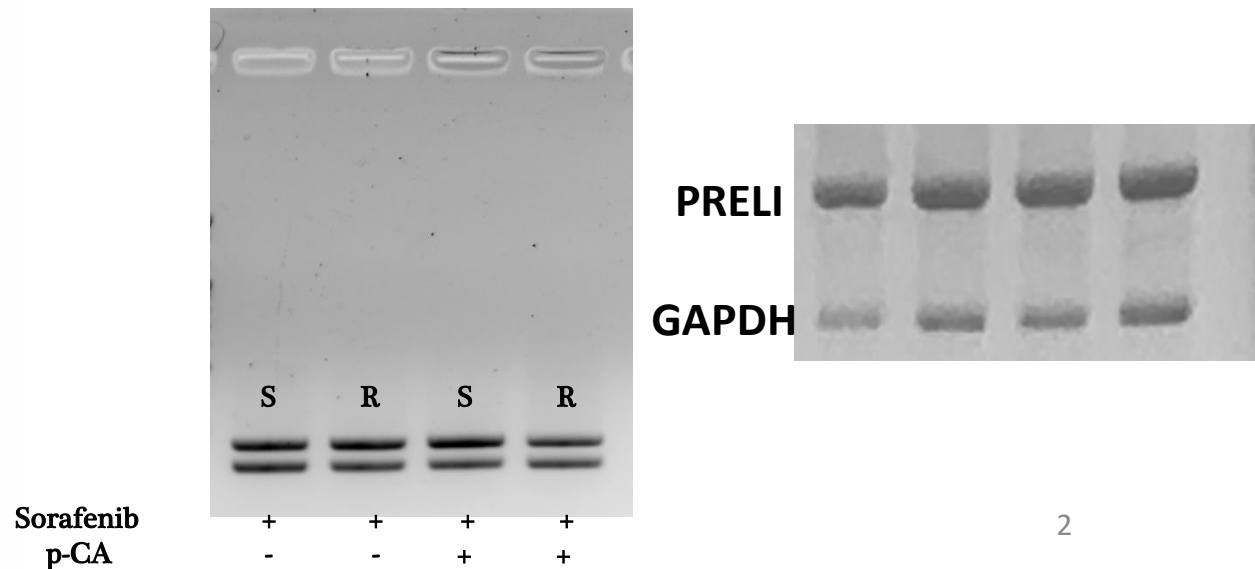

Figure3

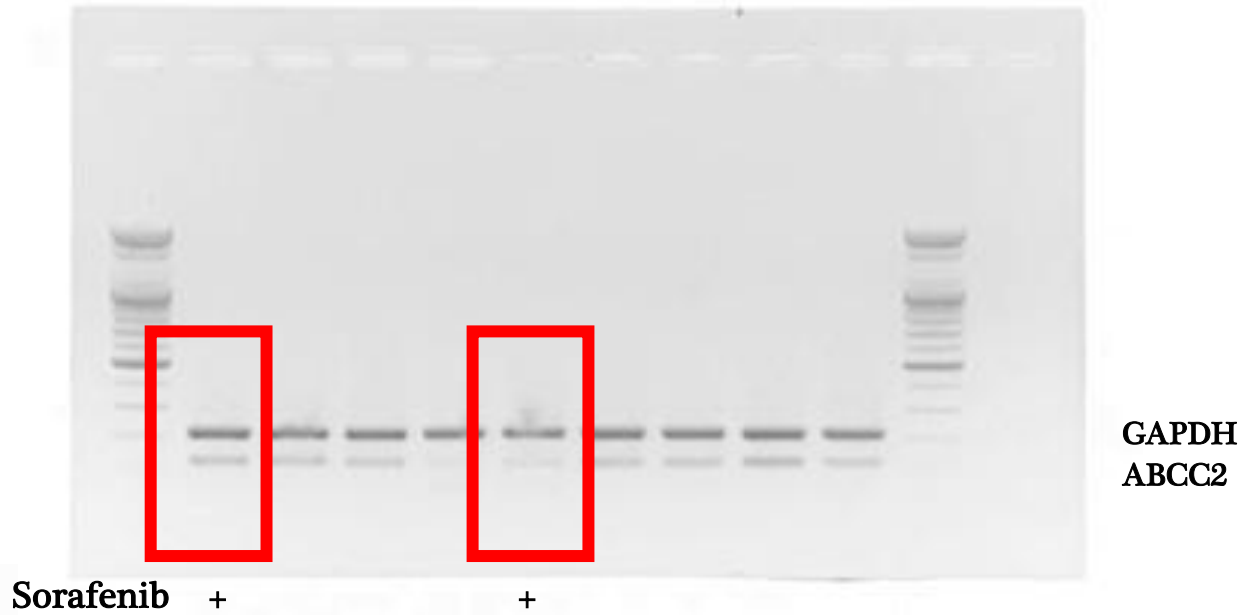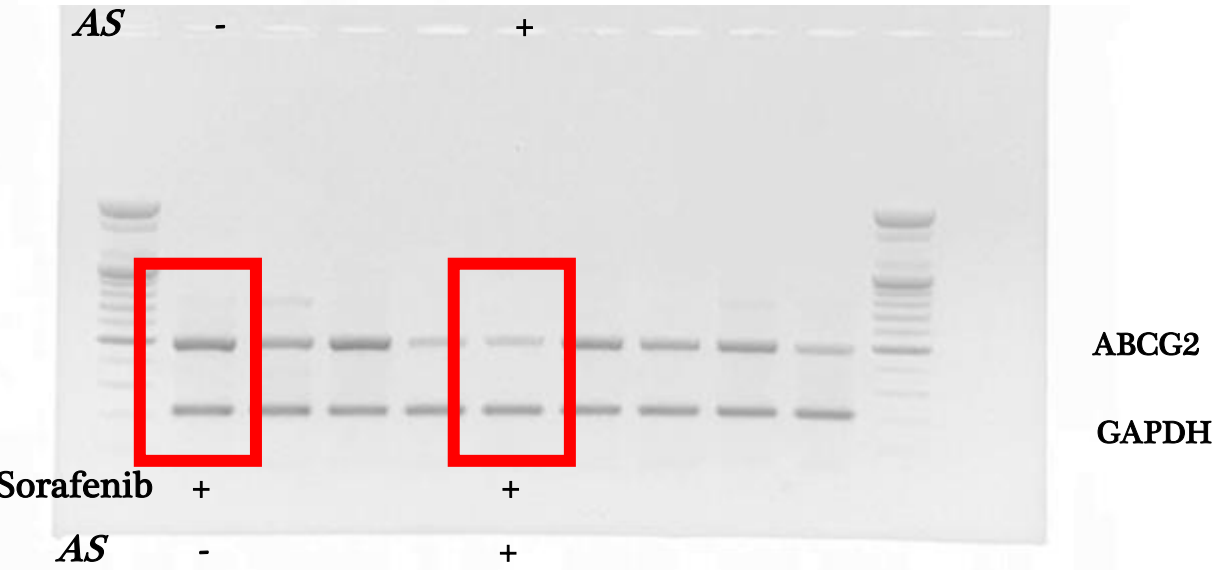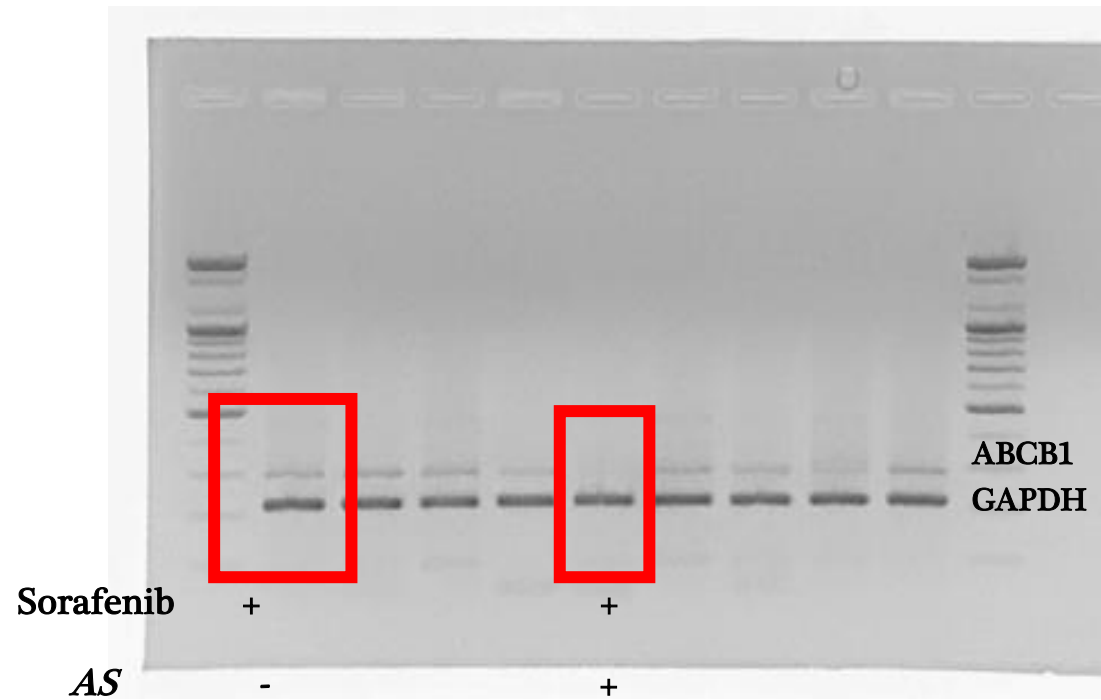

Figure4

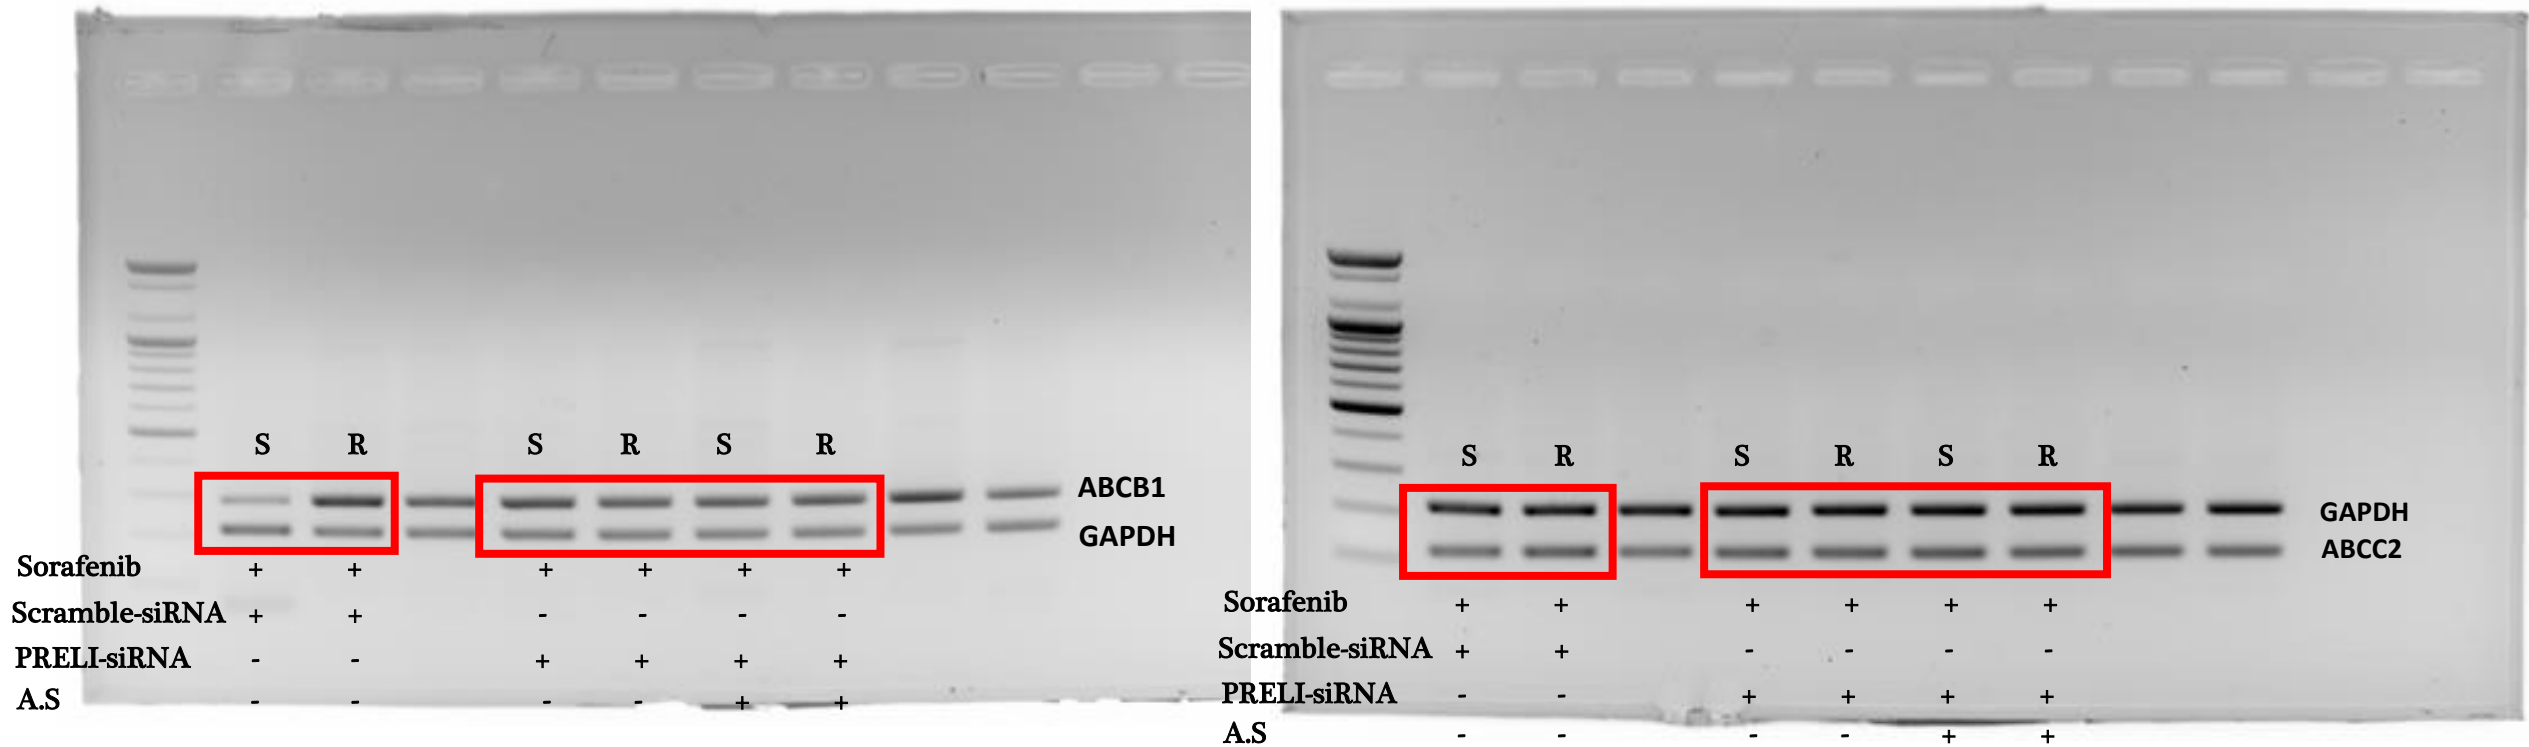

Figure4

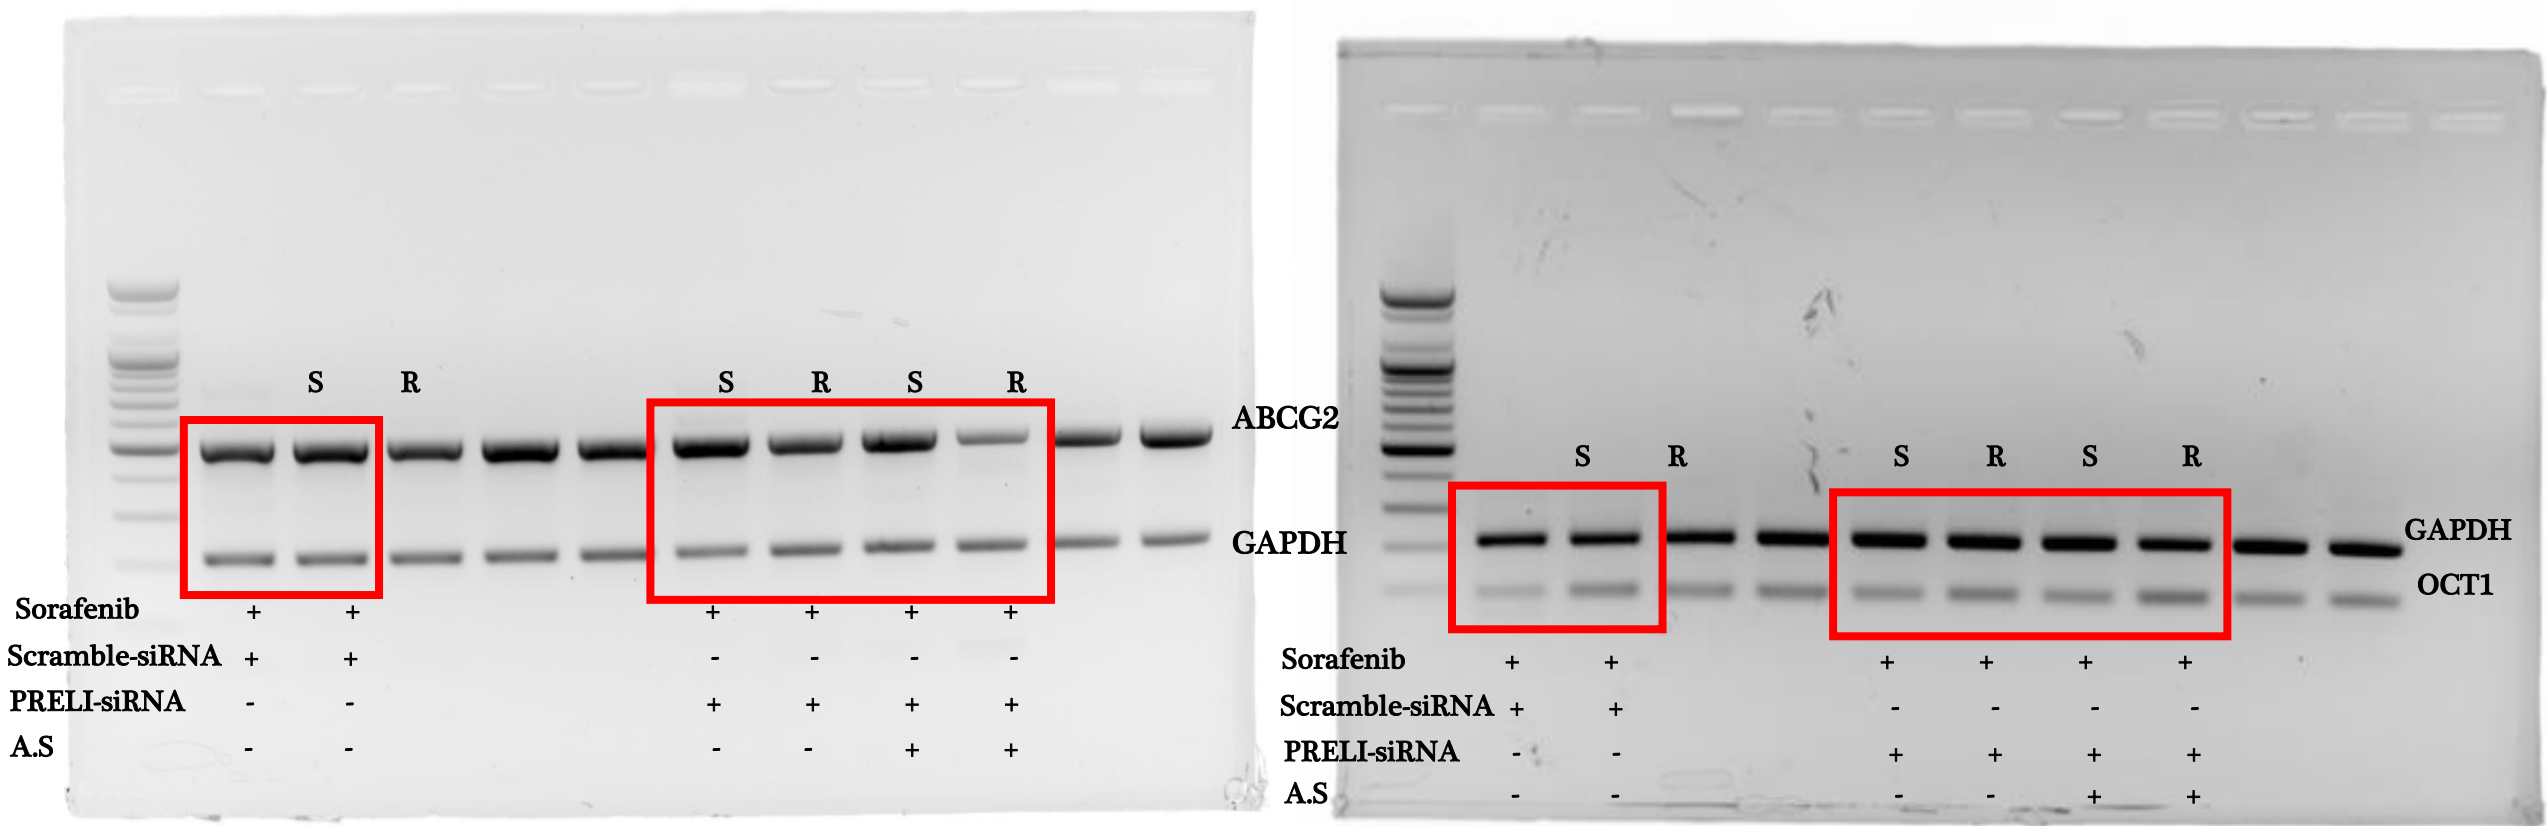

Figure6

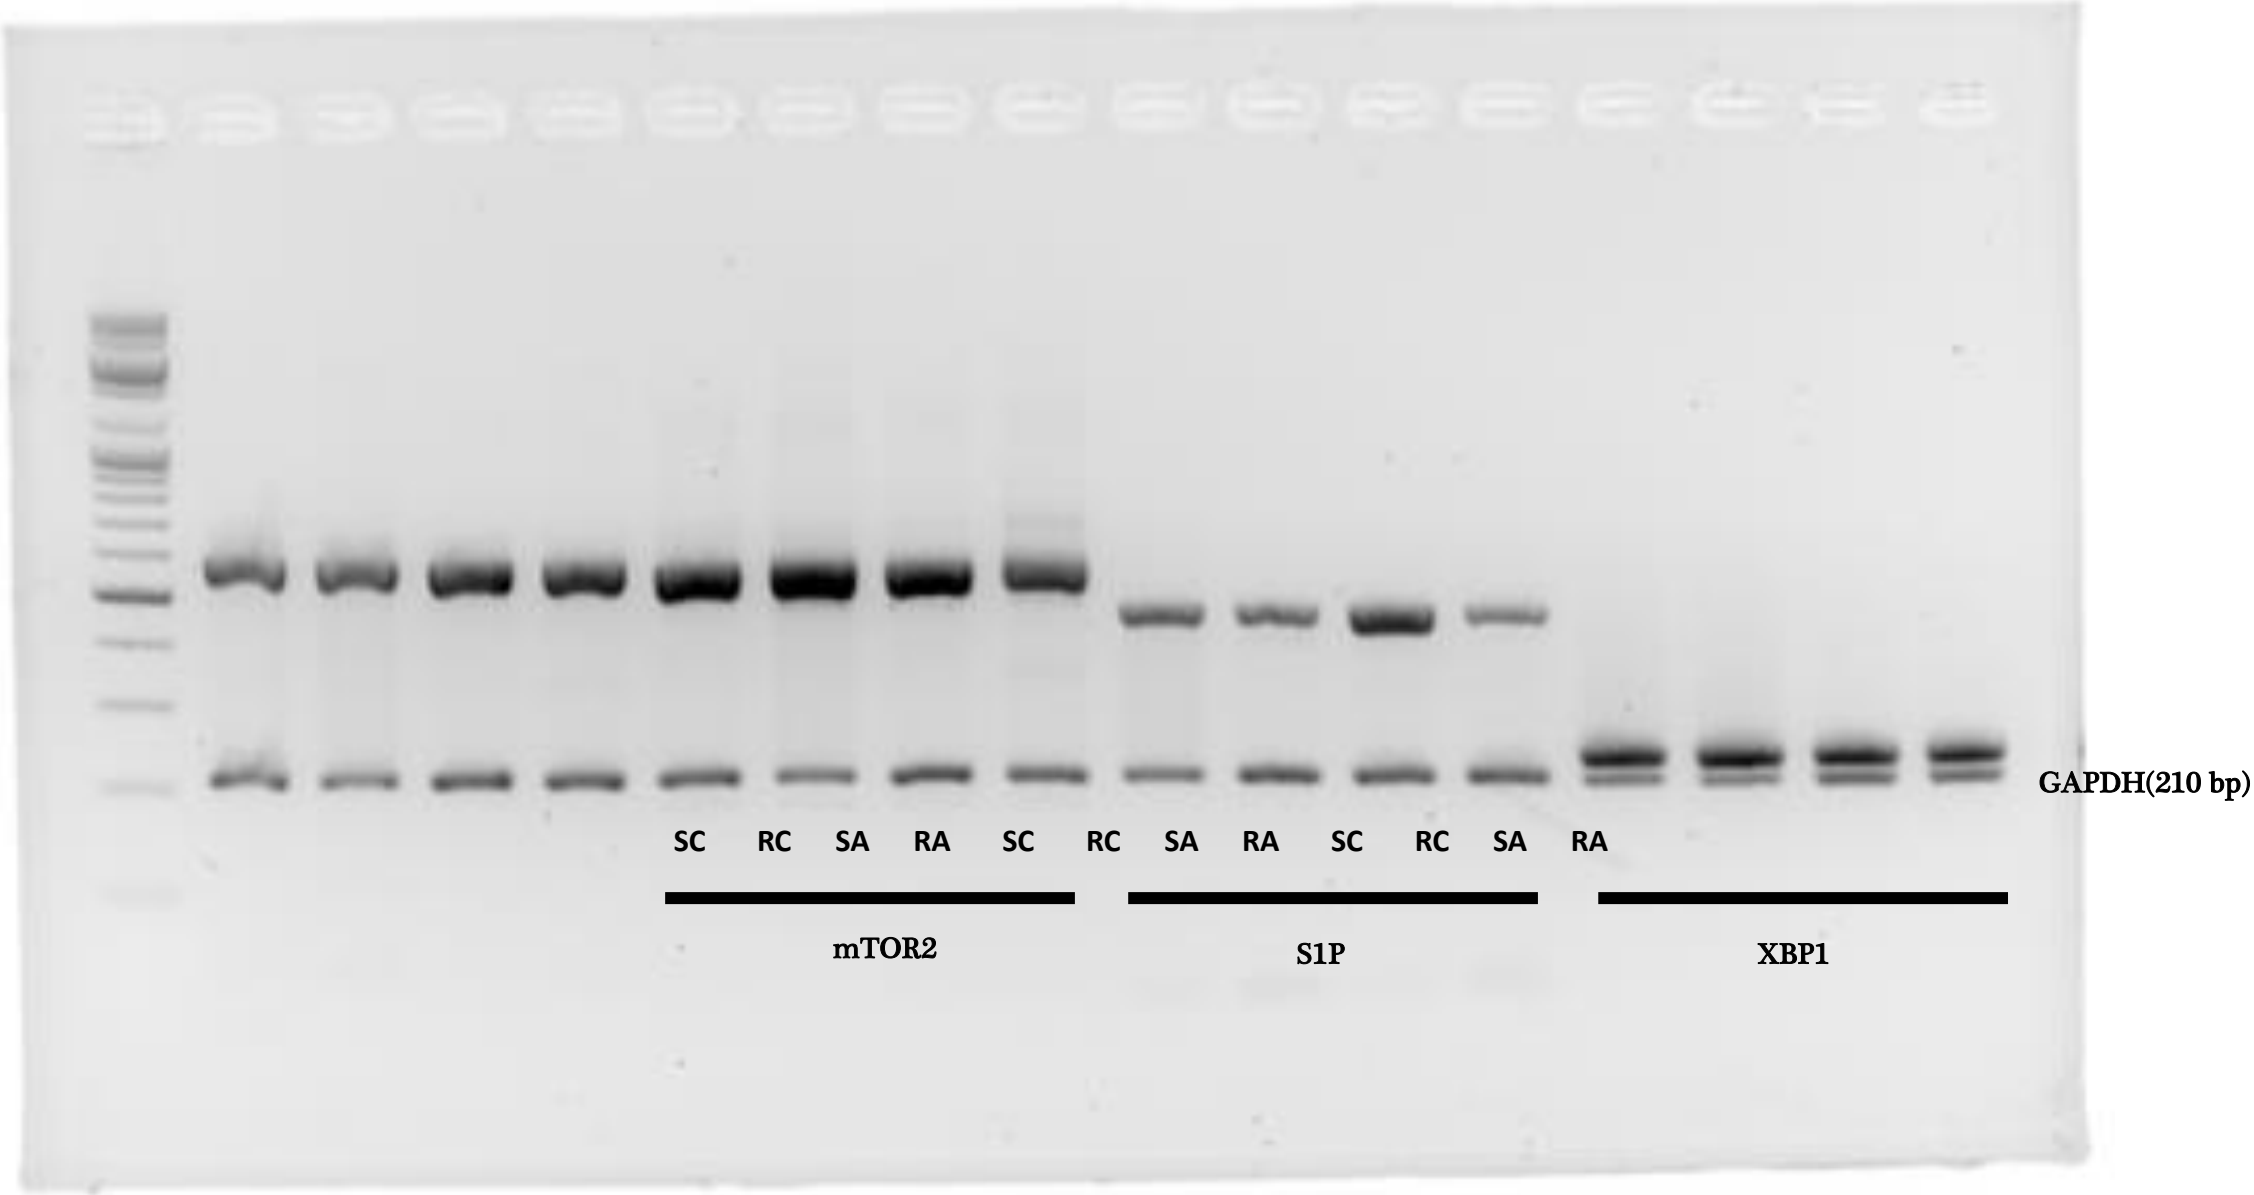

Figure6

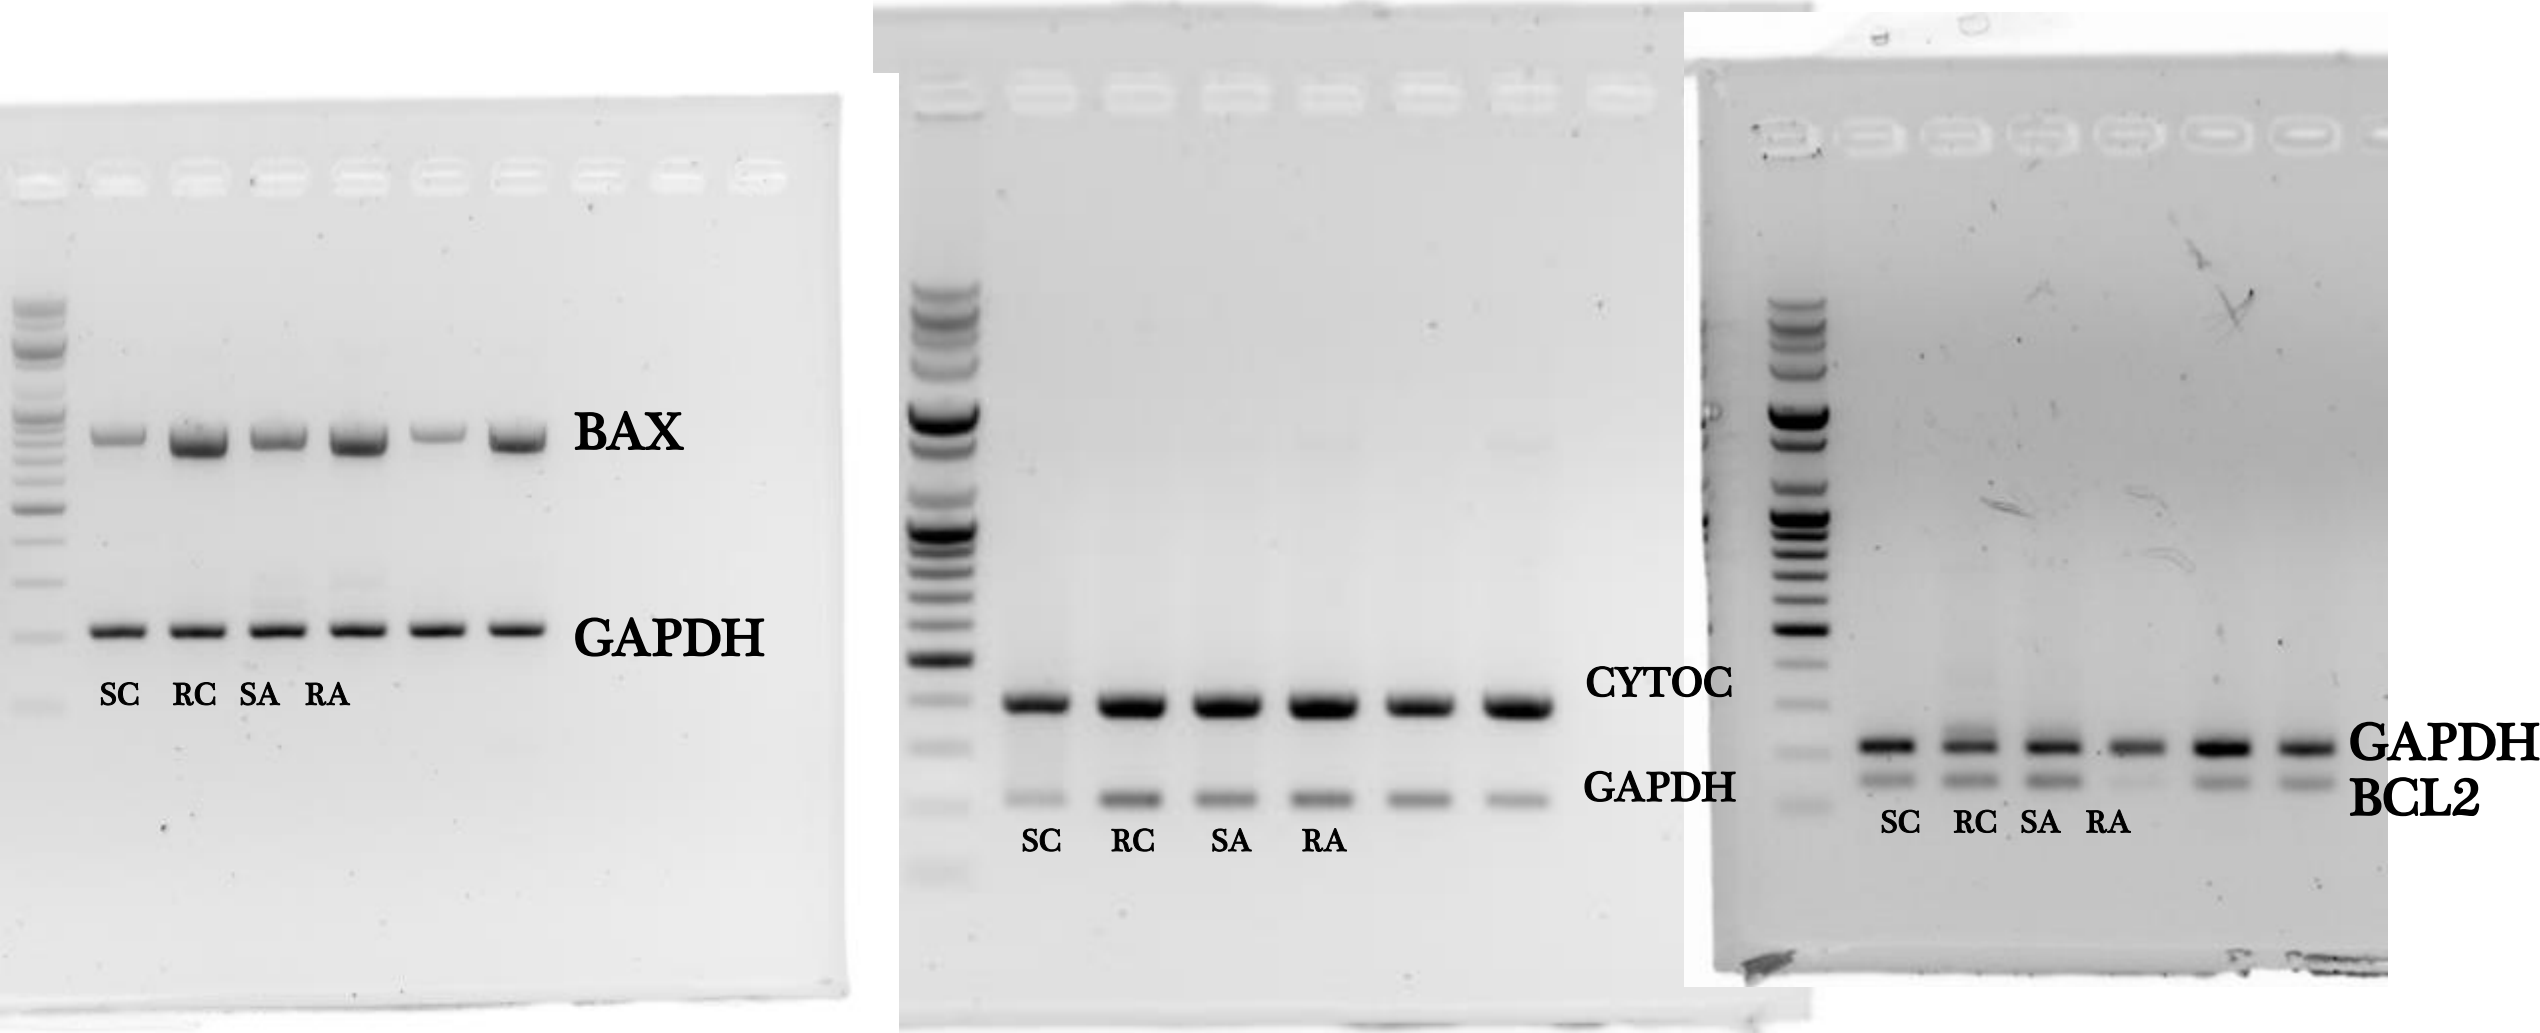

Supplement: s1 [file s1]

Figure S2. Cell viability of R and S HepG2 cells under the extract

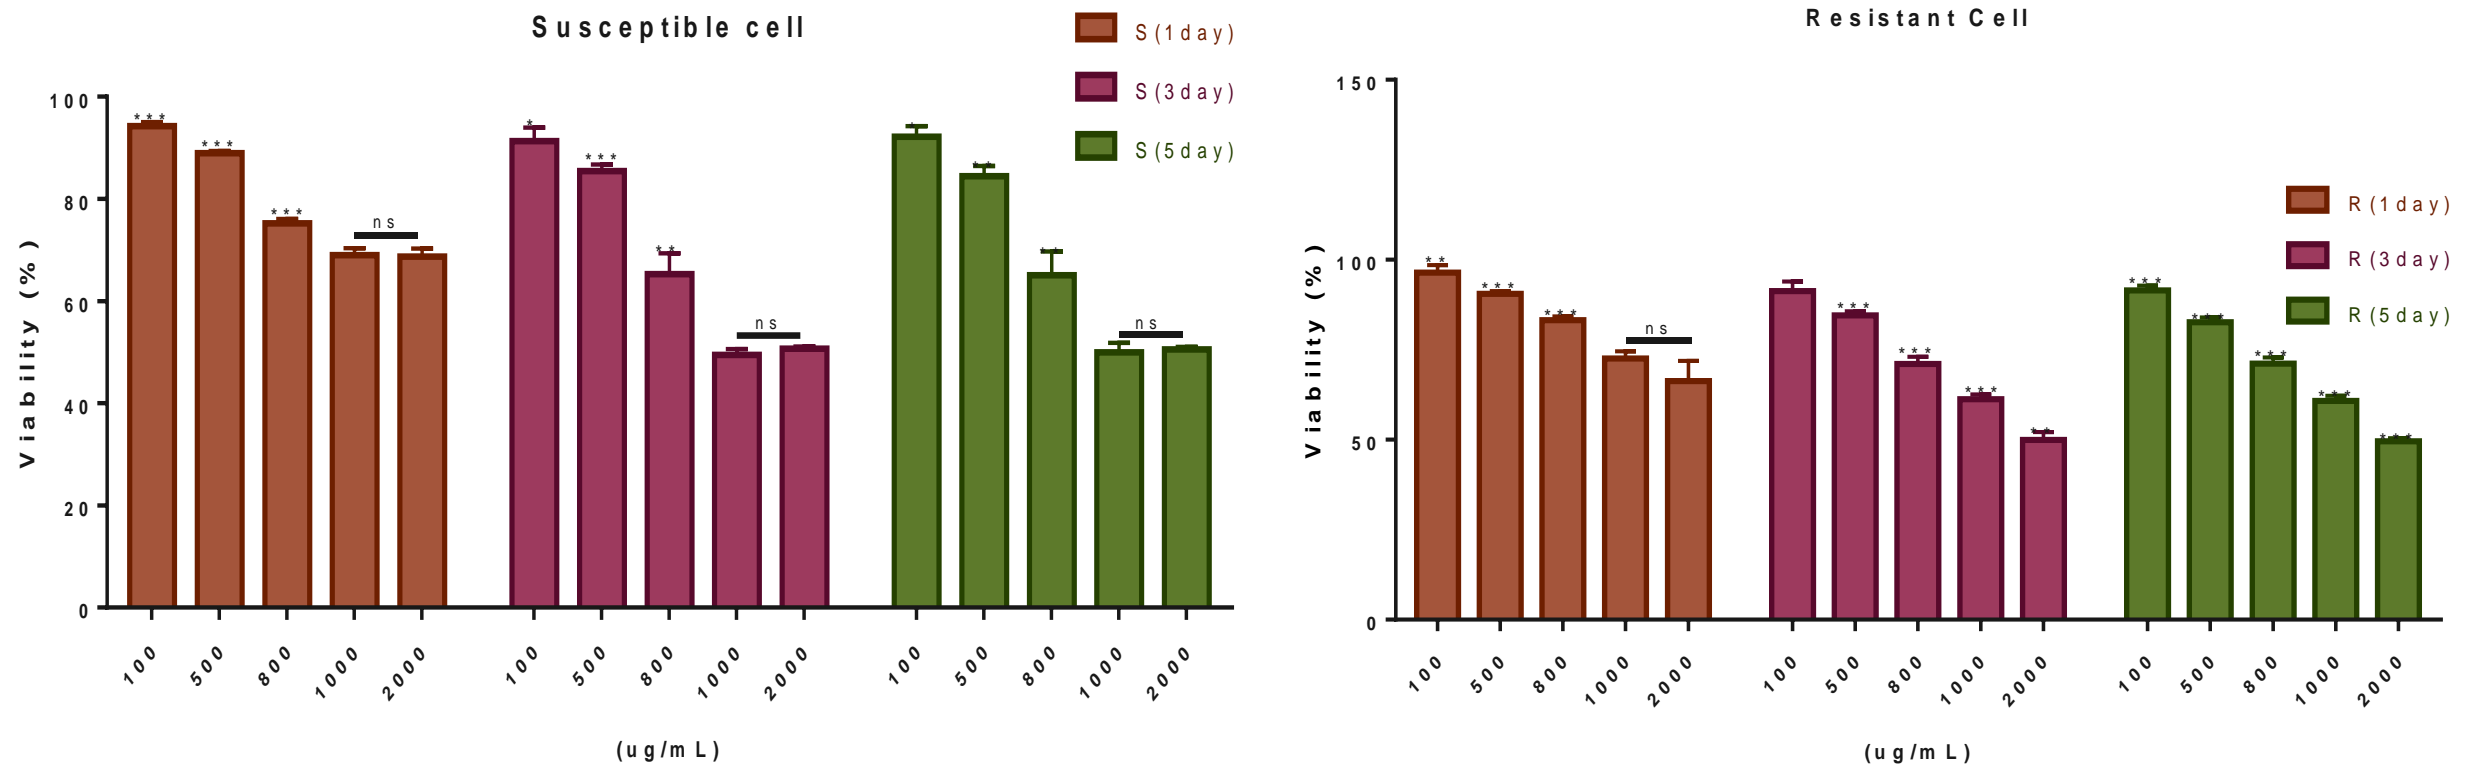

OaTP1  $\beta 1$  were not significant

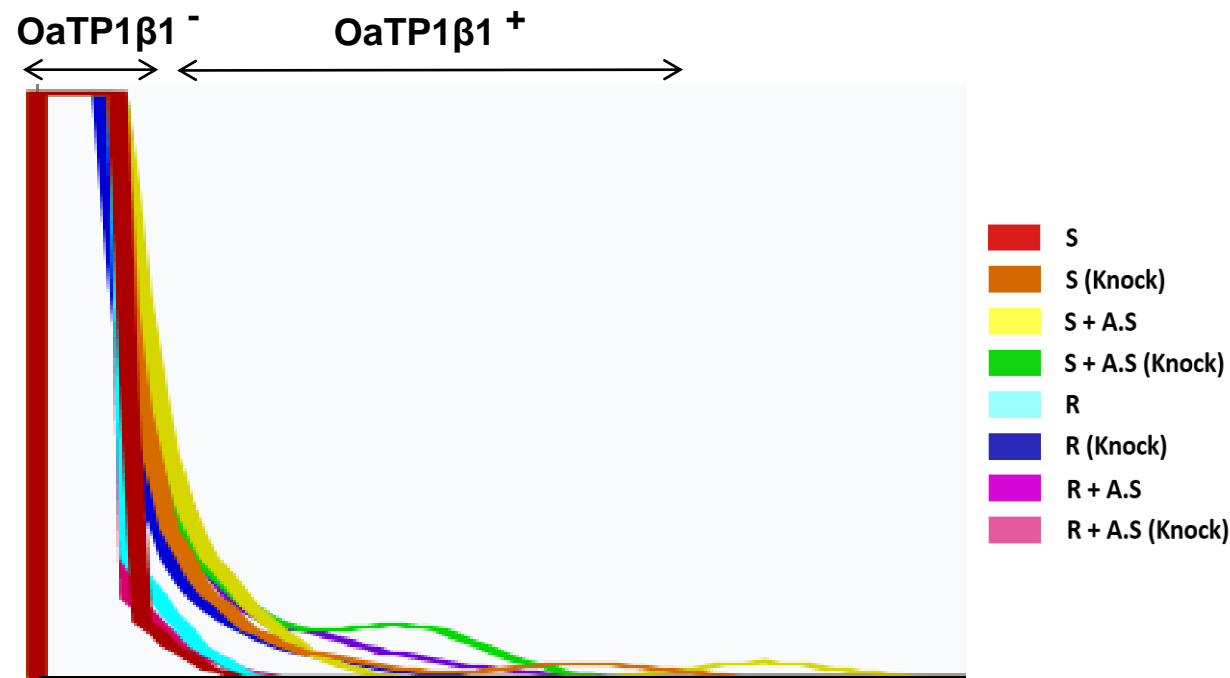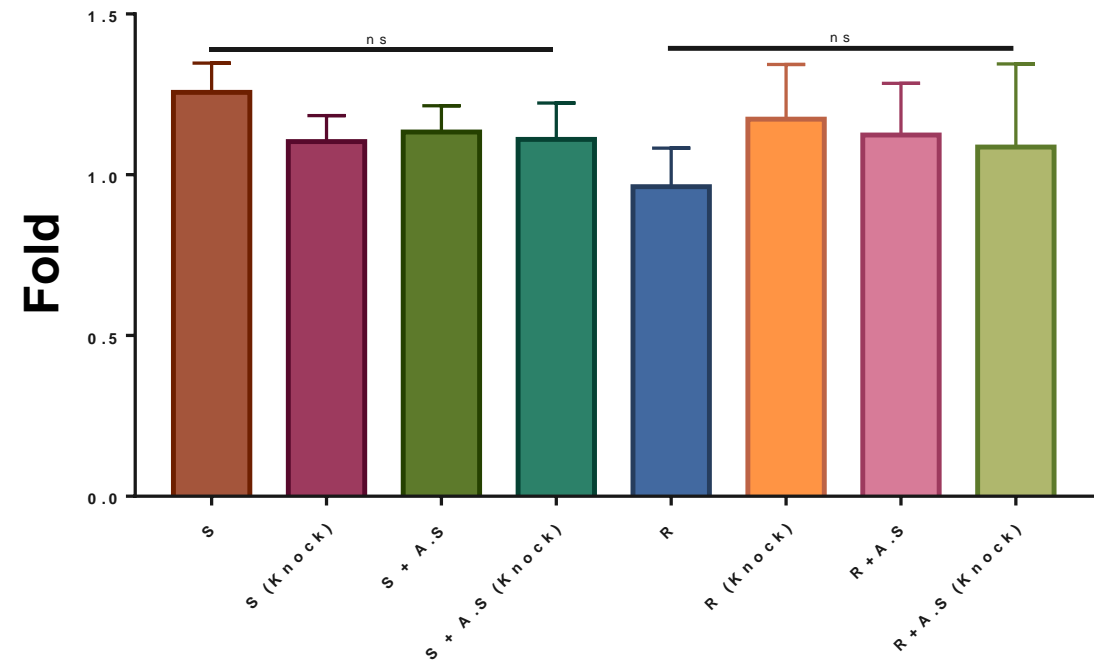

Supplement: s1 [file s1]
